# Supplementary material
Source: PubMed Central journal article supplement (PMC10272086)

# Supplemental Data

- Table of Contents:
  - Page 2 – eTable 1: Institutional Experience with VV ECMO between January 1, 2018 – January 31, 2022
  - Page 3 – eTable 2: Baseline Characteristics and Outcomes of Prolonged VV ECMO Patients
  - Page 4 – eFigure 1: Evaluation and Management of Patients with Refractory Respiratory Failure
  - Page 5 – eFigure 2: Anticoagulation Protocol

eTable 1: Institutional Experience with Venovenous Extracorporeal Membrane Oxygenation between January 1, 2018 – January 31, 2022

| Variable                                           | Extremely Prolonged VV ECMO ( $\geq 50$ days) n=12 | VV ECMO (< 50 days) n=118 |
|----------------------------------------------------|----------------------------------------------------|---------------------------|
| <b>Patient Characteristics</b>                     |                                                    |                           |
| Age (years)                                        | 39 (35-51)                                         | 47 (36-57)                |
| Male sex                                           | 75% (9)                                            | 74% (87)                  |
| Race                                               |                                                    |                           |
| White                                              | 50% (6)                                            | 54% (64)                  |
| Hispanic                                           | 42% (5)                                            | 30% (35)                  |
| Black                                              | 0% (0)                                             | 8% (9)                    |
| Other                                              | 8% (1)                                             | 8% (10)                   |
| Primary Diagnosis                                  |                                                    |                           |
| Acute respiratory distress syndrome                | 100% (12)                                          | 59% (70)                  |
| Respiratory failure                                | 0% (0)                                             | 37% (43)                  |
| Hypoxia                                            | 0% (0)                                             | 4% (5)                    |
| COVID-19 (+)                                       | 92% (11)                                           | 41% (48)                  |
| Time from intubation to VV ECMO cannulation (days) | 5 (2-14)                                           | 4 (1-8)                   |
| Total duration (days)                              | 94 (70-128)                                        | 13 (5-25)                 |
| <b>Mobility on ECMO</b>                            |                                                    |                           |
| <b>Complications on VV ECMO Support</b>            |                                                    |                           |
| Cannulation site bleeding                          | 83% (10)                                           | 25% (30)                  |
| Circuit exchange                                   | 75% (9)                                            | 14% (16)                  |
| Pump malfunction                                   | 42% (5)                                            | 11% (13)                  |
| Oxygenator failure                                 | 58% (7)                                            | 7% (8)                    |
| Gastrointestinal bleed                             | 33% (4)                                            | 10% (12)                  |
| Hemorrhagic stroke                                 | 8% (1)                                             | 16% (19)                  |
| Ischemic stroke                                    | 8% (1)                                             | 2% (2)                    |
| Pneumothorax                                       | 50% (6)                                            | 11% (13)                  |
| Dialysis                                           | 17% (2)                                            | 19% (23)                  |
| Culture-proven infection                           | 50% (6)                                            | 17% (20)                  |
| <b>Outcomes</b>                                    |                                                    |                           |
| Final ECMO Status                                  |                                                    |                           |
| Bridged to recovery                                | 17% (2)                                            | 40% (48)                  |
| Bridged to transplantation                         | 50% (6)                                            | 7% (8)                    |
| Expired                                            | 33% (4)                                            | 53% (62)                  |
| Final Discharge Status                             |                                                    |                           |
| Alive                                              | 58% (7)                                            | 47% (55)                  |
| Discharged home                                    | 25% (3)                                            | 22% (26)                  |
| Discharged to rehabilitation                       | 33% (4)                                            | 25% (29)                  |
| Expired                                            | 42% (5)                                            | 53% (63)                  |
| Length of hospitalization (days)                   | 97 (89-150)                                        | 35 (22-57)                |

eTable 2: Baseline Characteristics and Outcomes for Patients Undergoing Prolonged (> 50 days) Venovenous Extracorporeal Membrane Oxygenation Support

| Patient No. | Age (years) | Sex    | Race            | Intubation - Cannulation (days) | ECMO duration (days) | Cannulation strategy | Greatest Level of Mobility          | Final ECMO Status     | Discharge Status | Discharge location |
|-------------|-------------|--------|-----------------|---------------------------------|----------------------|----------------------|-------------------------------------|-----------------------|------------------|--------------------|
| 1           | 80          | Male   | White           | 2                               | 68                   | RFV, RIJ             | Bedrest                             | Withdrawn             | Dead             | N/A                |
| 2           | 31          | Male   | Hispanic        | 1                               | 139                  | LFV, RIJ             | Bedrest                             | Withdrawn             | Dead             | N/A                |
| 3           | 67          | Male   | Hispanic        | 5                               | 94                   | RFV, RIJ             | Bedrest                             | Withdrawn             | Dead             | N/A                |
| 4           | 36          | Female | White           | 6                               | 117                  | LFV, RIJ             | Sitting in bed, exercises in bed    | Bridged to Transplant | Alive            | Transfer to Rehab  |
| 5           | 52          | Male   | Hispanic        | 3                               | 145                  | RFV, RIJ             | Standing                            | Bridged to Transplant | Alive            | Home               |
| 6           | 38          | Female | White           | 6                               | 80                   | RFV, RIJ             | Transferring bed to chair           | Bridged to Transplant | Dead             | N/A                |
| 7           | 36          | Male   | Hispanic        | 2                               | 71                   | RFV, RIJ             | Walking with 1 person assist        | Bridged to Recovery   | Alive            | Transfer to Rehab  |
| 8           | 34          | Female | Native Hawaiian | 35                              | 95                   | RFV, RIJ             | Sitting over edge of bed            | Withdrawn             | Dead             | N/A                |
| 9           | 32          | Male   | White           | 5                               | 94                   | Bifemoral, RIJ       | Walking independently with gait aid | Bridged to Transplant | Alive            | Transfer to Rehab  |
| 10          | 45          | Male   | White           | 42                              | 56                   | RFV, RIJ             | Walking independently with gait aid | Bridged to Transplant | Alive            | Home               |
| 11          | 51          | Male   | White           | 11                              | 180                  | RFV, RIJ             | Transferring bed to chair           | Bridged to Transplant | Alive            | Transfer to Rehab  |
| 12          | 40          | Male   | Hispanic        | 18                              | 56                   | RFV, RIJ             | Transferring bed to chair           | Bridged to Recovery   | Alive            | Home               |

eFigure 1: Evaluation and Management of Patients with Refractory Respiratory Failure

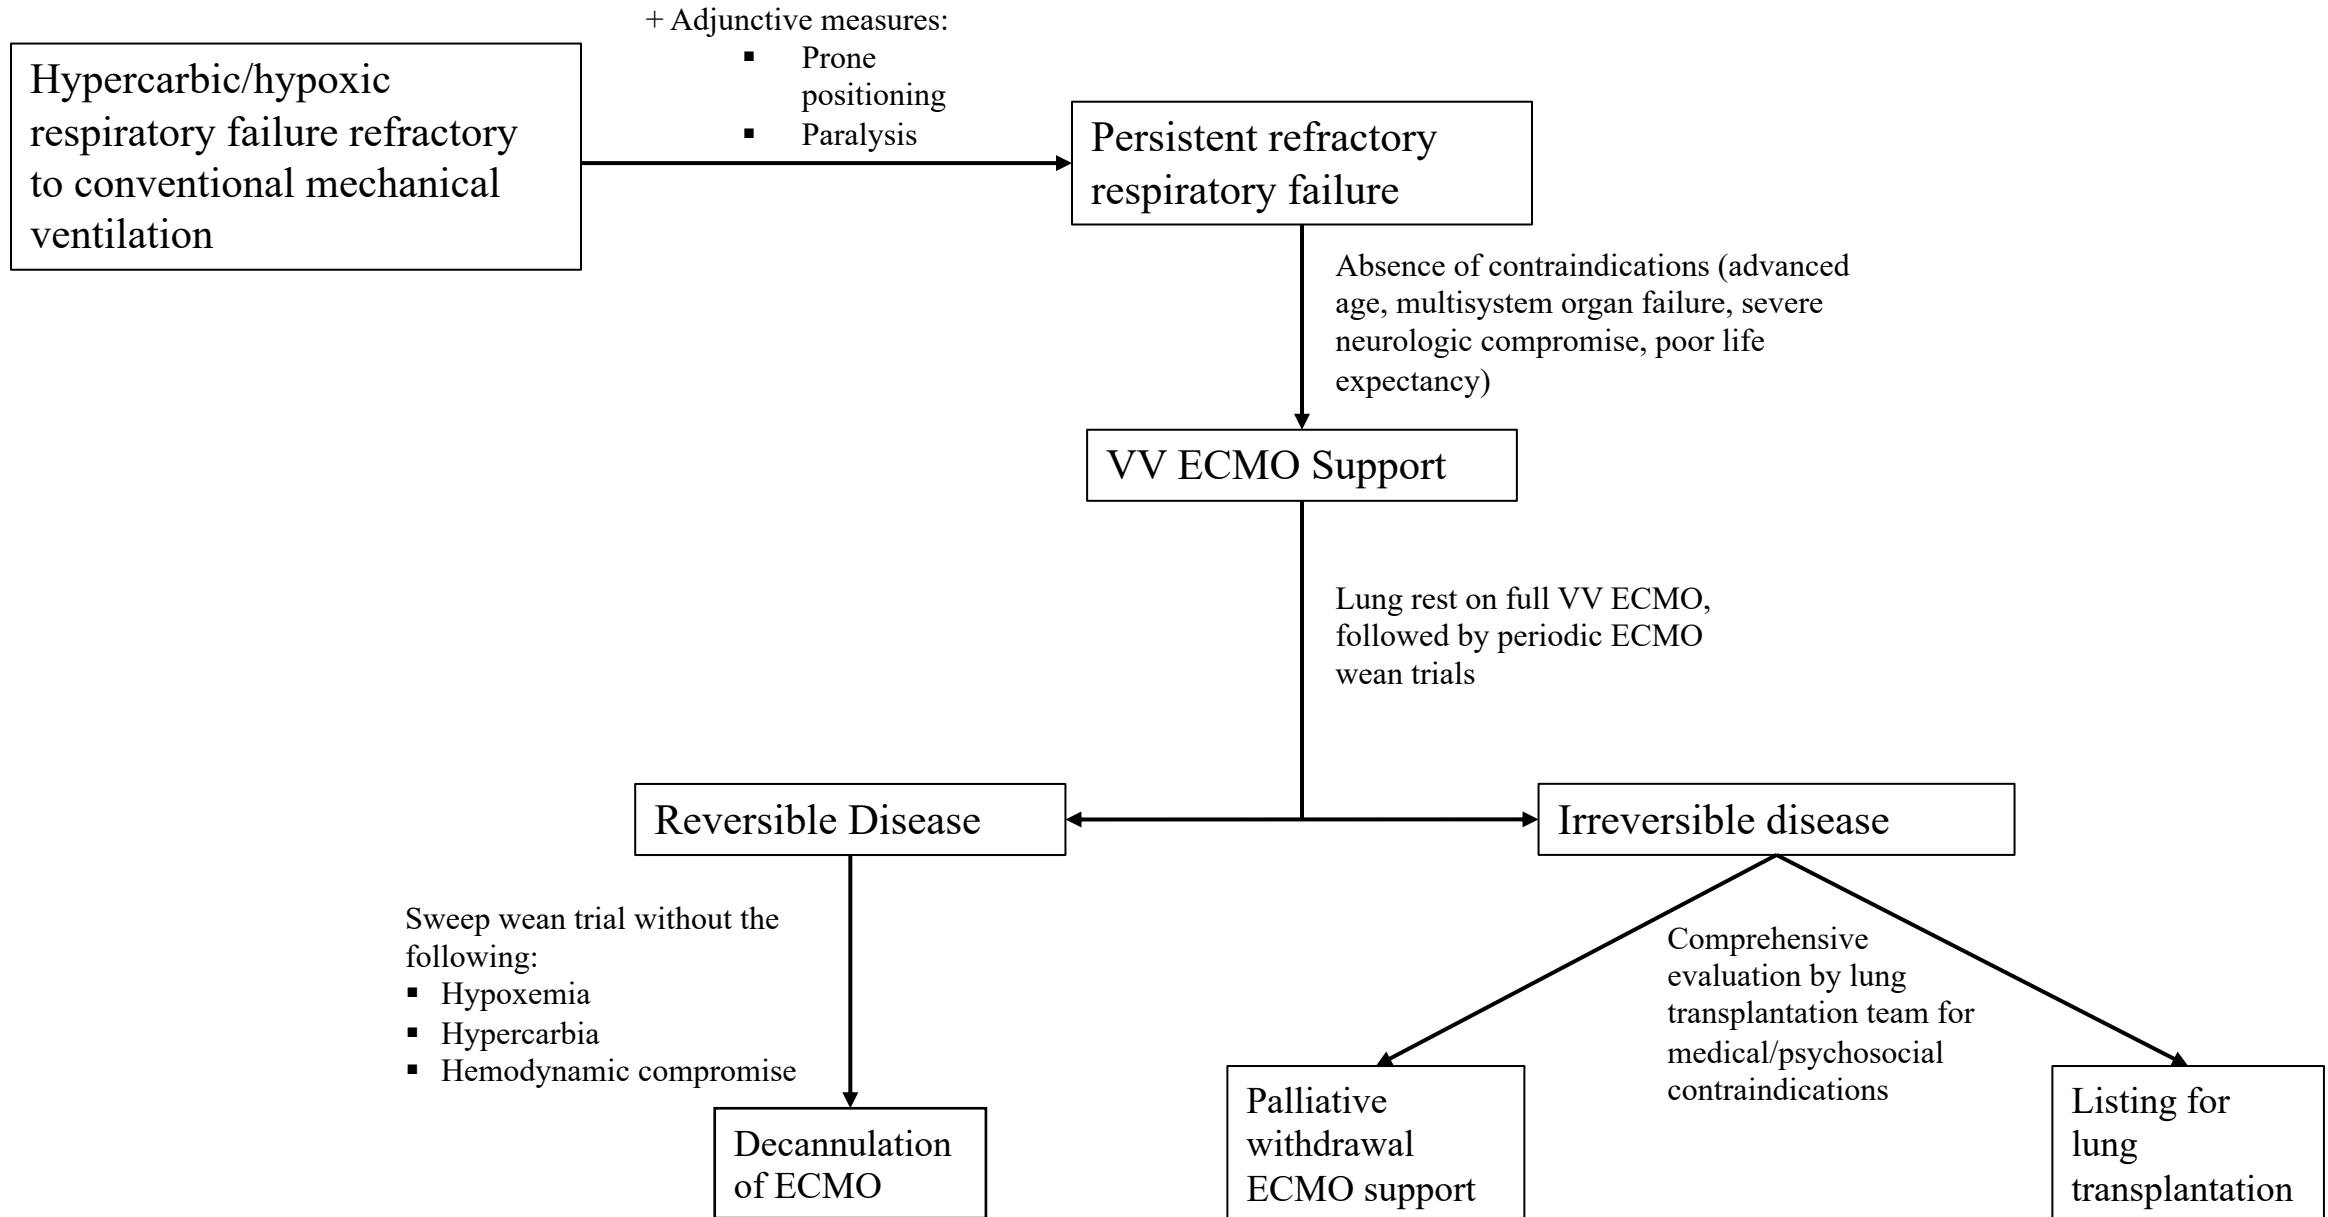

eFigure 2: Anticoagulation Protocol

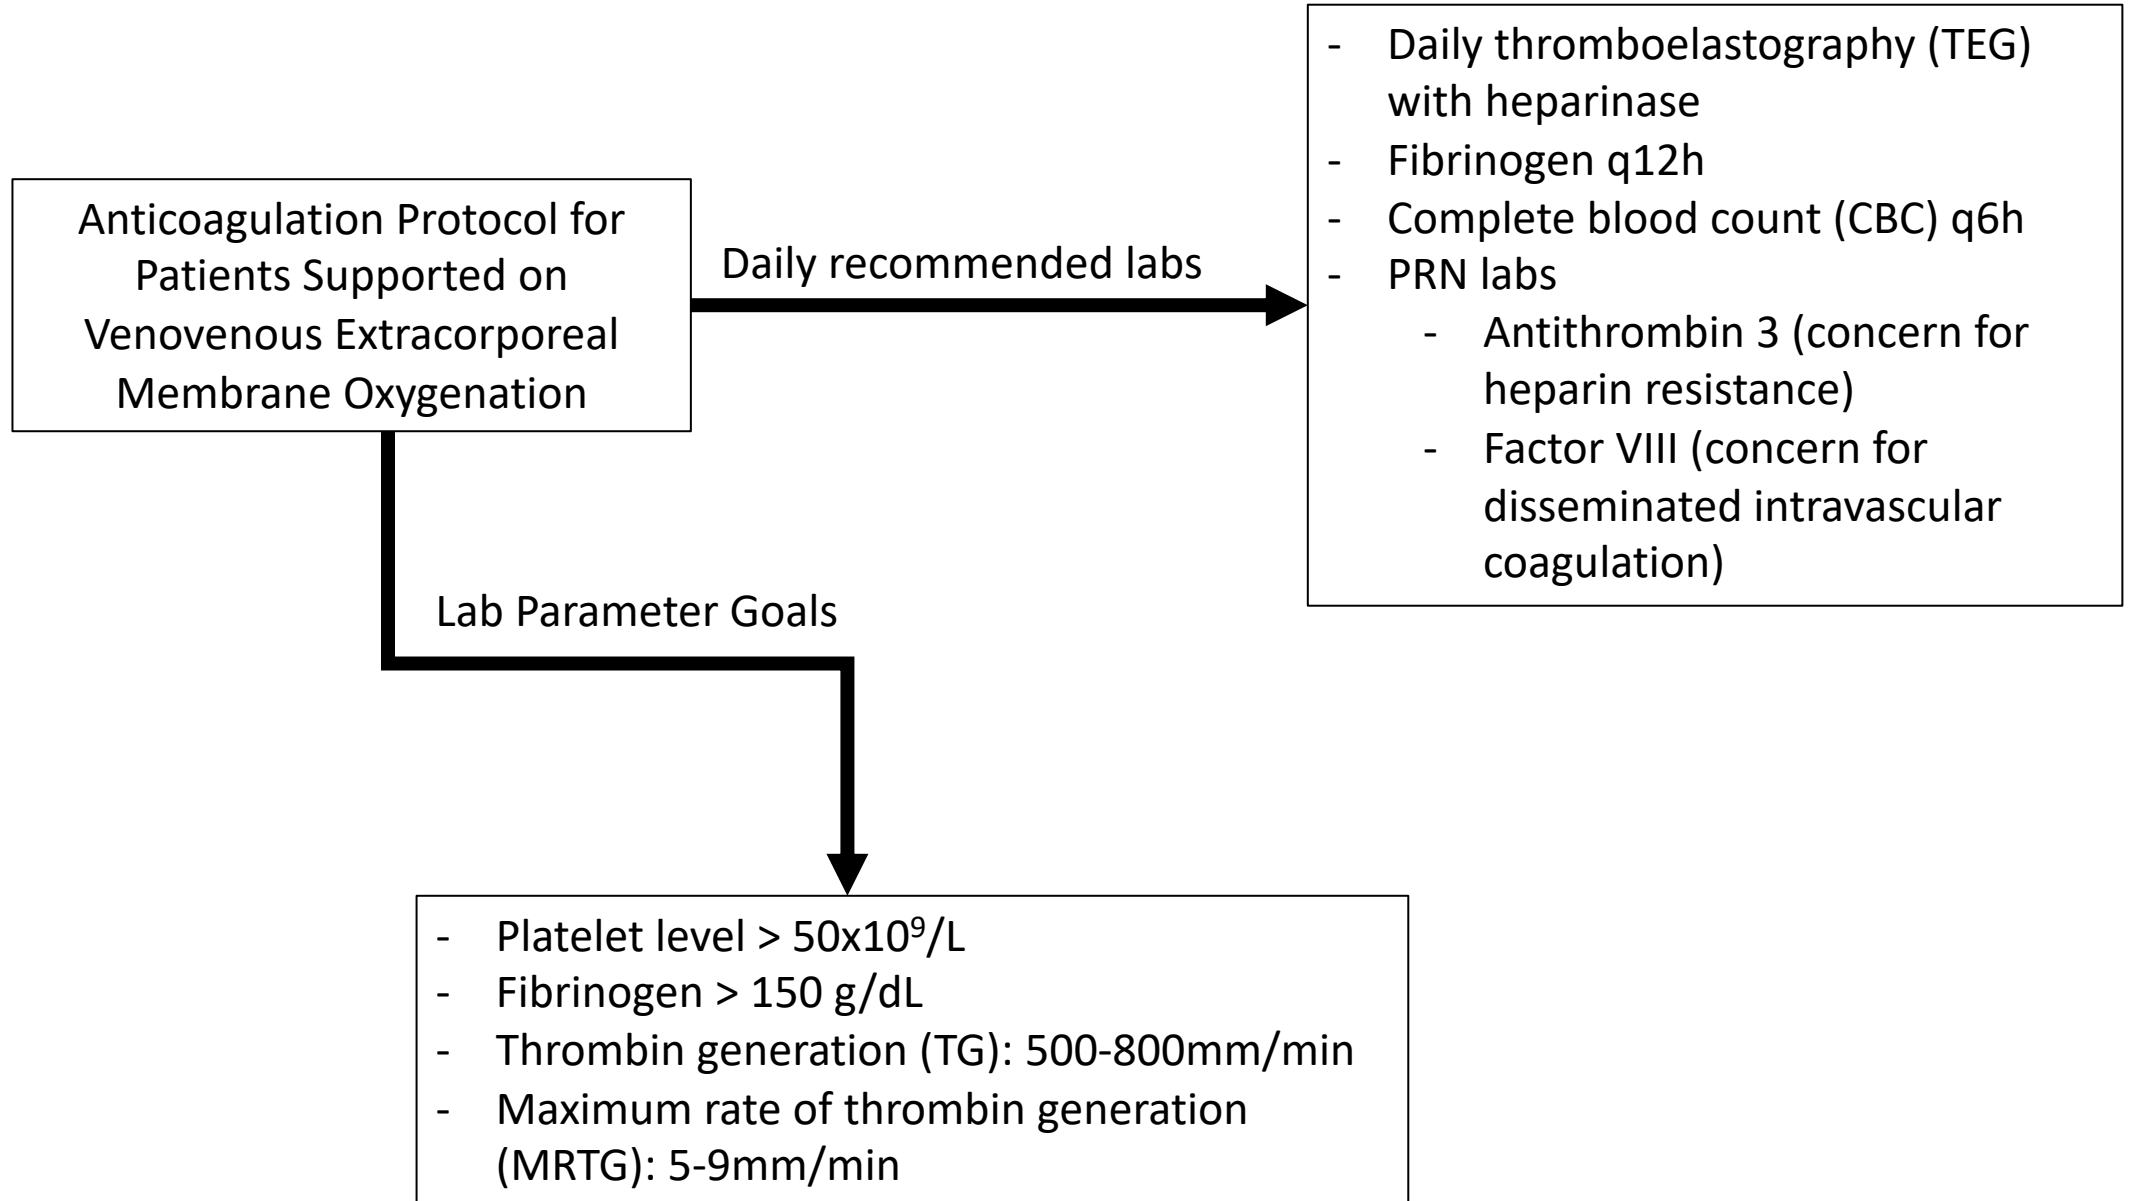

Supplement: NIHMS1874723-supplement-Supplemental_Data_File___doc___tif__pdf__etc__.pdf [file NIHMS1874723-supplement-Supplemental_Data_File___doc___tif__pdf__etc__.pdf]
